# Supplementary material
Source: Springer Nature journal article supplement (https://www.springermedizin.de/resource/supplementary/12985_2009_628_MOESM8_ESM.pdf/9608150)

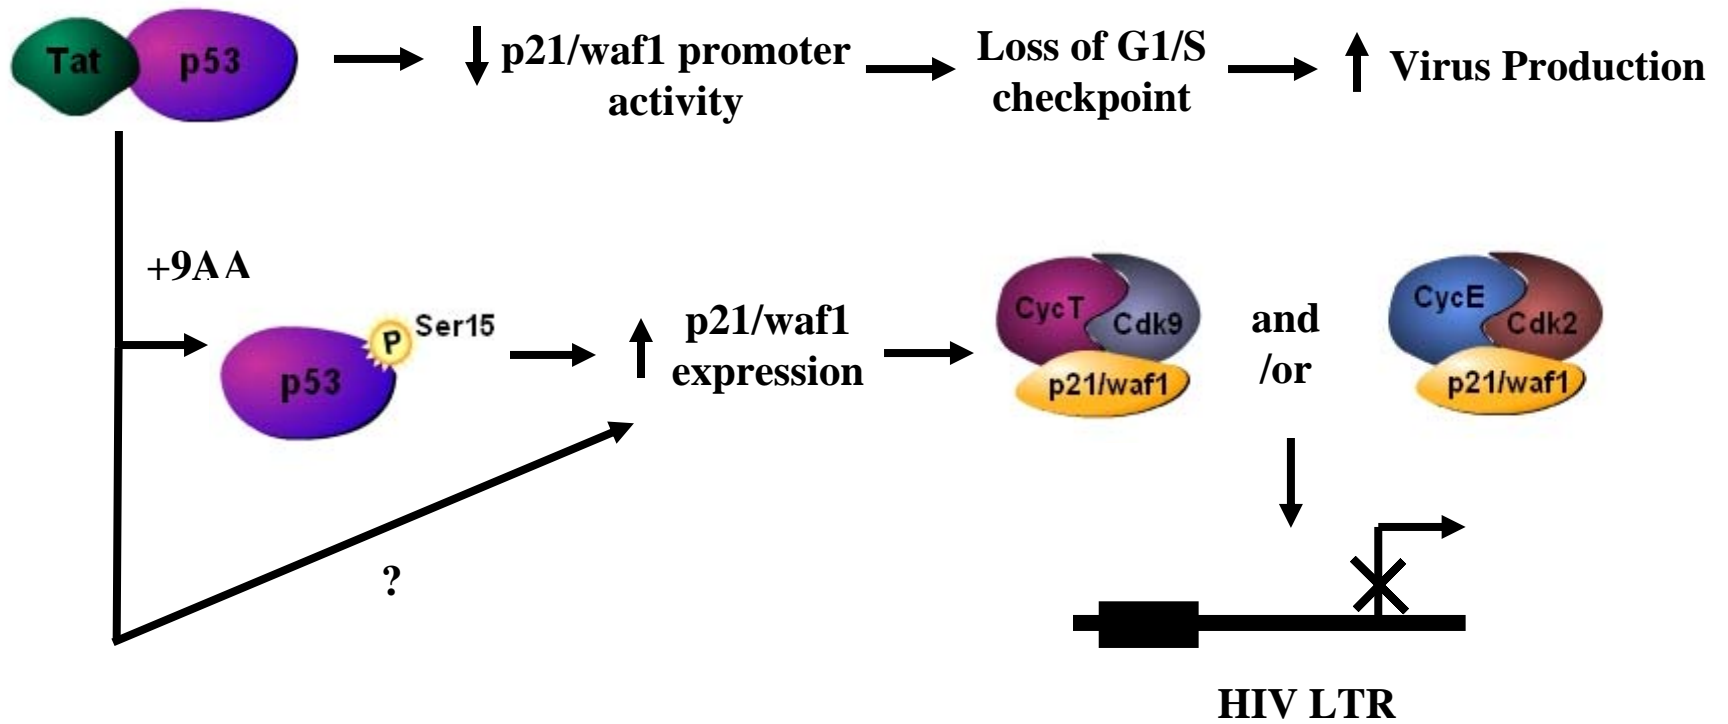

Figure 7. Guendel *et al.*

Supplement: MOESM8 [file 9608150]
